# Supplementary material for: Relationships between Vacant Homes and Food Swamps: A Longitudinal Study of an Urban Food Environment
Source: MDPI journal article supplement (doi:10.3390/ijerph14111426), 2017-11-21
Supplement: s1 [file s1]

## Supplementary Materials

**Table S1.** Each of 175 SIC definitions classified into one of 10 crude food outlet categories [17].

| SIC definition                              | Crude food outlet category  |
|---------------------------------------------|-----------------------------|
| 1. Beverage stores                          | Carry-out restaurants       |
| 2. Box lunch stand                          |                             |
| 3. Cafe                                     |                             |
| 4. Cafes                                    |                             |
| 5. Cafeteria                                |                             |
| 6. Carry-out only (except pizza) restaurant |                             |
| 7. Chicken restaurant                       |                             |
| 8. Chili stand                              |                             |
| 9. Coffee                                   |                             |
| 10. Coffee & tea                            |                             |
| 11. Coffee roasting & handling equipment    | Carry-out restaurants cont. |
| 12. Coffee shop                             |                             |
| 13. Coffee shops                            |                             |
| 14. Delicatessen (eating places)            |                             |
| 15. Delicatessen stores                     |                             |
| 16. Delicatessens                           |                             |
| 17. Drive-in restaurant                     |                             |
| 18. Food bars                               |                             |
| 19. Foods-carry out                         |                             |
| 20. Hamburger stand                         |                             |
| 21. Health food restaurant                  | Convenience stores          |
| 22. Hot dog stand                           |                             |
| 23. Luncheonette                            |                             |
| 24. Lunchrooms and cafeterias               |                             |
| 25. Pizza                                   |                             |
| 26. Pizza restaurants                       |                             |
| 27. Pizzeria, chain                         |                             |
| 28. Pizzeria, independent                   |                             |
| 29. Sandwiches                              |                             |
| 30. Sandwiches and submarines shop          |                             |
| 31. Tea                                     | Fast-food restaurants       |
| 32. Tea rooms                               |                             |
| 33. Restaurants-food delivery               |                             |
| 34. Convenience stores                      |                             |
| 35. Convenience stores, chain               |                             |
| 36. Convenience stores, independent         |                             |
| 37. Dairy products stores                   |                             |
| 38. Dairy products-retail                   |                             |
| 39. Filling stations, gasoline              |                             |
| 40. Gasoline service stations               |                             |
| 41. Petroleum products (whls)               | Full-service restaurants    |
| 42. Service stations-gasoline & oil         |                             |
| 43. Fast food restaurants and stands        |                             |
| 44. Fast-food restaurant, chain             |                             |
| 45. Fast-food restaurant, independent       |                             |
| 46. American restaurant                     |                             |
| 47. Barbecue restaurant                     |                             |
| 48. Buffet (eating places)                  |                             |
| 49. Cajun restaurant                        |                             |
| 50. Caterers                                |                             |
| 51. Chinese restaurant                      |                             |
| 52. Diner                                   |                             |
| 53. Eating places                           |                             |
| 54. Ethnic food restaurants                 |                             |
| 55. Family restaurants                      |                             |
| 56. French restaurant                       |                             |
| 57. Greek restaurant                        |                             |
| 58. Grills (eating places)                  |                             |
| 59. Indian pakistan restaurant              |                             |

|                                                    |                                |
|----------------------------------------------------|--------------------------------|
| 60. Italian restaurant                             |                                |
| 61. Japanese restaurant                            |                                |
| 62. Korean restaurant                              |                                |
| 63. Macaroni spaghetti & noodles (mfrs)            |                                |
| 64. Mexican restaurant                             |                                |
| 65. Oyster bar                                     | Full-service restaurants cont. |
| 66. Restaurant management                          |                                |
| 67. Restaurant, family: chain                      |                                |
| 68. Restaurant, family: independent                |                                |
| 69. Restaurant, lunch counter                      |                                |
| 70. Restaurants                                    |                                |
| 71. Seafood restaurants                            |                                |
| 72. Seafood shack                                  |                                |
| 73. Spanish restaurant                             |                                |
| 74. Steak and barbecue restaurants                 |                                |
| 75. Steak restaurant                               |                                |
| 76. Sushi bar                                      |                                |
| 77. Thai restaurant                                |                                |
| 78. Vietnamese restaurant                          |                                |
| 79. Department stores                              |                                |
| 80. Department stores, discount                    |                                |
| 81. Drug stores                                    |                                |
| 82. Drug stores and proprietary stores             |                                |
| 83. Miscellaneous general merchandise stores       | General merchandise stores     |
| 84. Pharmacies                                     |                                |
| 85. Proprietary (non-prescription medicine) stores |                                |
| 86. Retail shops                                   |                                |
| 87. Variety stores                                 |                                |
| 88. Dried fruit                                    |                                |
| 89. Eggs and poultry                               |                                |
| 90. Eggs-retail                                    |                                |
| 91. Fish and seafood markets                       | Healthy specialty stores       |
| 92. Fish markets                                   |                                |
| 93. Food and freezer plans, meat                   |                                |
| 94. Food brokers (whls)                            |                                |
| 95. Food products & manufacturers                  |                                |
| 96. Frozen food and freezer plans, except meat     |                                |
| 97. Fruit and vegetable markets                    |                                |
| 98. Fruits & vegetables & produce-retail           |                                |
| 99. Health & diet foods-retail                     |                                |
| 100. Health and dietetic food stores               |                                |
| 101. Health foods                                  |                                |
| 102. Meat and fish markets                         |                                |
| 103. Meat markets-kosher                           |                                |
| 104. Meat markets, including freezer provisioners  |                                |
| 105. Meat-retail                                   |                                |
| 106. Meat-wholesale                                |                                |
| 107. Mushrooms                                     |                                |
| 108. Nuts                                          |                                |
| 109. Nuts-edible                                   |                                |
| 110. Poultry-retail                                |                                |
| 111. Salads (whls)                                 | Healthy specialty stores cont. |
| 112. Seafood markets                               |                                |
| 113. Seafood packers (mfrs)                        |                                |
| 114. Seafood-retail                                |                                |
| 115. Vegetable stands or markets                   |                                |
| 116. Food products (whls)                          |                                |
| 117. Chinese food products                         |                                |
| 118. Freezer provisioners, meat                    |                                |
| 119. Gourmet food stores                           | Mixed specialty stores         |
| 120. Gourmet shops                                 |                                |
| 121. Juices-retail                                 |                                |
| 122. Kosher food products-wholesale                |                                |
| 123. Oriental goods                                |                                |
| 124. Food markets                                  | Small grocers/corner stores    |
| 125. Grocers-retail                                |                                |

|                                                     |                                  |
|-----------------------------------------------------|----------------------------------|
| 126. Grocers-wholesale                              |                                  |
| 127. Grocery stores                                 |                                  |
| 128. Grocery stores, chain                          |                                  |
| 129. Grocery stores, independent                    |                                  |
| 130. Miscellaneous food stores                      |                                  |
| 131. Food products-retail                           |                                  |
| 132. Supermarkets                                   |                                  |
| 133. Supermarkets, chain                            |                                  |
| 134. Supermarkets, independent                      |                                  |
| 135. Wholesale clubs                                | Superstores                      |
| 136. Wholesalers                                    |                                  |
| 137. Bagels                                         |                                  |
| 138. Bakers-retail                                  |                                  |
| 139. Bakers-wholesale                               |                                  |
| 140. Boutique items-retail                          |                                  |
| 141. Bread                                          |                                  |
| 142. Bread/other bakery prod-ex cookies             |                                  |
| 143. Butter                                         |                                  |
| 144. Cakes                                          |                                  |
| 145. Candy                                          |                                  |
| 146. Candy & confectionery-manufacturers            |                                  |
| 147. Candy & confectionery-retail                   |                                  |
| 148. Candy, nut, and confectionery stores           |                                  |
| 149. Cheese                                         | Unhealthy specialty stores       |
| 150. Chocolate & cocoa-manufacturers                |                                  |
| 151. Cookies                                        |                                  |
| 152. Cookies & crackers                             |                                  |
| 153. Doughnuts                                      |                                  |
| 154. Frozen yogurt stand                            |                                  |
| 155. Ice cream & frozen desserts-distr (whls)       |                                  |
| 156. Ice cream (packaged)                           |                                  |
| 157. Ice cream parlors                              |                                  |
| 158. Ice cream stands or dairy bars                 |                                  |
| 159. Ice cream, soft drink and soda fountain stands |                                  |
| 160. Italian food products                          |                                  |
| 161. Meat products (mfrs)                           |                                  |
| 162. Pastries                                       |                                  |
| 163. Popcorn & popcorn supplies                     | Unhealthy specialty stores cont. |
| 164. Pretzels                                       |                                  |
| 165. Pretzels-retail                                |                                  |
| 166. Retail bakeries                                |                                  |
| 167. Sausages                                       |                                  |
| 168. Sausages/other prepared meat prod (mfrs)       |                                  |
| 169. Snack bar                                      |                                  |
| 170. Snack products                                 |                                  |
| 171. Snack shop                                     |                                  |
| 172. Snow cone stand                                |                                  |
| 173. Soda fountain                                  |                                  |
| 174. Soda fountain shops                            |                                  |
| 175. Yogurt                                         |                                  |

**Table S2.** Keywords used to identify and tag dollar stores and carry-out restaurants [17].

|                                                                       |
|-----------------------------------------------------------------------|
| Keywords for dollar stores:                                           |
| Dollar                                                                |
| Local experts also identified and previously validated the following: |
| Deals                                                                 |
| J H Wholesale                                                         |
| Liberty Buys                                                          |

---

|                                     |
|-------------------------------------|
| Keywords for carry-out restaurants: |
| Chicken                             |
| Pizza                               |
| Pizzeria                            |
| Burger                              |
| Hamburgers                          |
| Chinese                             |
| China                               |
| Taco                                |
| Tacos                               |
| Deli                                |
| Delicatessen                        |
| Bagel                               |
| Bagels                              |
| Sandwich                            |
| Sandwiches                          |
| Coffee                              |
| Wings                               |
| Carry                               |
| Carry-out                           |
| Carryout                            |

---

**Table S3.** Top 50 fast food chain restaurants in the U.S, reported by the leading source of information for the quick-service industry, QRS Magazine (Available at: <https://www.qsrmagazine.com/reports/qs50-2015-top-50-chart>) [17].

| Rank | Company/Chain Name        | Rank | Company/Chain Name    |
|------|---------------------------|------|-----------------------|
| 1    | McDonald's                | 41   | Boston Market         |
| 2    | Starbucks                 | 42   | In-n-Out Burger       |
| 3    | Subway                    | 43   | Moe's Southwest Grill |
| 4    | Burger King               | 44   | Long John Silver's    |
| 5    | Wendy's                   | 45   | Firehouse Subs        |
| 6    | Taco Bell                 | 46   | Baskin-Robbins        |
| 7    | Dunkin' Donuts            | 47   | Jersey Mike's Subs    |
| 8    | Chick-fil-A               | 48   | Jamba Juice           |
| 9    | Pizza Hut                 | 49   | Captain D's           |
| 10   | Panera Bread              | 50   | Einstein Bros. Bagels |
| 11   | KFC                       |      |                       |
| 12   | Domino's                  |      |                       |
| 13   | Sonic Drive-In            |      |                       |
| 14   | Chipotle                  |      |                       |
| 15   | Carl's Jr./Hardee's       |      |                       |
| 16   | Little Caesars            |      |                       |
| 17   | Dairy Queen               |      |                       |
| 18   | Arby's                    |      |                       |
| 19   | Jack in the Box           |      |                       |
| 20   | Papa John's               |      |                       |
| 21   | Popeyes Louisiana Kitchen |      |                       |
| 22   | Panda Express             |      |                       |
| 23   | Whataburger               |      |                       |
| 24   | Jimmy John's              |      |                       |
| 25   | Zaxby's                   |      |                       |
| 26   | Five Guys                 |      |                       |
| 27   | Culver's                  |      |                       |
| 28   | Bojangles'                |      |                       |
| 29   | Steak 'n Shake            |      |                       |
| 30   | Church's Chicken          |      |                       |
| 31   | Papa Murphy's             |      |                       |
| 32   | El Pollo Loco             |      |                       |
| 33   | Checkers/Rally's          |      |                       |
| 34   | Wingstop                  |      |                       |
| 35   | Qdoba                     |      |                       |
| 36   | Krispy Kreme              |      |                       |
| 37   | Del Taco                  |      |                       |
| 38   | White Castle              |      |                       |

**Table S4.** Average median sales price of homes of CSAs, according to neighborhood SES and proportion of the neighborhood population that is African American.

| <b>Predominantly African American, Cutoff at City's Average</b>  |                                             |         |                                             |         |
|------------------------------------------------------------------|---------------------------------------------|---------|---------------------------------------------|---------|
|                                                                  | African American neighborhoods<br>> 62%     |         | Non-African American neighborhoods<br>≤ 62% |         |
| <b>Neighborhood SES,<br/>cutoff at 50th percentile</b>           | Average median sales price of<br>homes (\$) | CSA (n) | Average median sales<br>price of homes (\$) | CSA (n) |
| Low-SES (≤\$98K)                                                 | \$ 65,479                                   | 23      | \$ 86,749                                   | 5       |
| High-SES (>\$98K)                                                | \$ 131,744                                  | 8       | \$ 187,5812                                 | 19      |
| <b>Neighborhood SES,<br/>cutoff at 75th percentile</b>           | Average median sales price of<br>homes (\$) | CSA (n) | Average median sales<br>price of homes (\$) | CSA (n) |
| Low-SES (≤\$162K)                                                | \$ 75,596                                   | 29      | \$ 114,564                                  | 13      |
| High-SES (>\$162K)                                               | \$ 183,847                                  | 2       | \$ 228,042                                  | 11      |
| <b>Predominantly African American, Cutoff at 75th Percentile</b> |                                             |         |                                             |         |
|                                                                  | African American neighborhoods<br>> 93%     |         | Non-African American neighborhoods<br>≤ 93% |         |
| <b>Neighborhood SES,<br/>cutoff at 50th percentile</b>           | Average median sales price of<br>homes (\$) | CSA (n) | Average median sales<br>price of homes (\$) | CSA (n) |
| Low-SES (≤\$98K)                                                 | \$ 60,705                                   | 13      | \$ 76,706                                   | 15      |
| High-SES (>\$98K)                                                | \$ 110,533                                  | 1       | \$ 173,364                                  | 26      |
| <b>Neighborhood SES,<br/>cutoff at 75th percentile</b>           | Average median sales price of<br>homes (\$) | CSA (n) | Average median sales<br>price of homes (\$) | CSA (n) |
| Low-SES (≤\$162K)                                                | \$ 64,265                                   | 14      | \$ 99,354                                   | 28      |
| High-SES (>\$162K)                                               | N/A                                         | 0       | \$ 221,243                                  | 13      |

The bold is to help differentiate the different subcategories/cutoff points i.e., 50<sup>th</sup> percentile cutoff and 75<sup>th</sup> percentile cutoff.

**Table S5.** Neighborhood fixed effects linear regression <sup>1</sup> for the relationship between changes in vacancy rates <sup>2</sup> and changes in the food swamp index <sup>3</sup> in Baltimore, MD, over the study period from 2001 to 2012, excluding CSA 52 and CSA 53 from 2001 through 2009. Results are from the pooled model and stratified models by African American neighborhoods and neighborhood SES.

|                             | Food Swamp Index        |         |                                                                        |         |                           |         |                                                          |         |                       |         |
|-----------------------------|-------------------------|---------|------------------------------------------------------------------------|---------|---------------------------|---------|----------------------------------------------------------|---------|-----------------------|---------|
|                             | Pooled Model            |         | Stratified Models<br>(By Predominantly African American <sup>4</sup> ) |         |                           |         | Stratified Models<br>(By Neighborhood SES <sup>5</sup> ) |         |                       |         |
|                             |                         |         | Non-African American<br>≤ 62%                                          |         | African American<br>> 62% |         | High-SES<br>> \$98,000                                   |         | Low-SES<br>≤\$98,000  |         |
|                             | b<br>(90% CI)           | p-value | b<br>(90% CI)                                                          | p-value | b<br>(90% CI)             | p-value | b<br>(90% CI)                                            | p-value | b<br>(90% CI)         | p-value |
| Vacancy rate                | 0.070<br>(-0.073, 0.21) | 0.42    | -0.38<br>(-0.64, -0.12)                                                | 0.015   | 0.15<br>(-0.060, 0.36)    | 0.24    | -0.37<br>(-0.75, 0.021)                                  | 0.12    | 0.17<br>(0.045, 0.29) | 0.025   |
| Vacancy rate,<br>1-year lag | 0.0031<br>(-0.15, 0.16) | 0.97    | -                                                                      |         |                           |         | -                                                        |         |                       |         |

<sup>1</sup> The statistical models for the food swamp index is a neighborhood fixed effects linear regression model. Models include a fixed effect for each CSA, which accounts for baseline differences by CSA, indicator variables for each year to account for any secular trends in the outcome, and as time-varying covariates, neighborhood racial diversity index, median sales price of homes, and total population size.

<sup>2</sup> Vacancy rate was defined as the number of vacant and abandoned homes divided by the average number of homes, then multiplied by 100. Homes are classified as vacant and abandoned by Baltimore City Housing if the property is not habitable.

<sup>3</sup> Food swamp index was defined as the density (outlets per sq. mile) of BMI-unhealthy and BMI-intermediate outlets out of the density of all food outlets, including BMI-healthy outlets, then multiplied by 100. This index was an adaptation of the Modified Retail Food Environment Index (mRFEI) [28] and Physical Food Environment Index (PFEI) [29].

<sup>4</sup> Predominantly African American neighborhoods were defined as those with greater than 62 percent African American residents, based on the City’s average proportion of African American residents across CSAs over the observation period.

<sup>5</sup> High-SES neighborhoods were defined as those with an average median sales price of homes greater than \$98,000, which was the average value for median sales price among CSAs over the observation period.

**Table S6.** Global Moran's I <sup>1</sup> statistic for the regression residuals <sup>2</sup>, over the study period.

| Year | Moran's I<br>(Regression Residuals) | <i>p</i> -value |
|------|-------------------------------------|-----------------|
| 2001 | 0.087                               | 0.099           |
| 2002 | 0.062                               | 0.110           |
| 2003 | 0.094                               | 0.074           |
| 2004 | 0.025                               | 0.250           |
| 2005 | 0.092                               | 0.072           |
| 2006 | 0.110                               | 0.061           |
| 2007 | 0.016                               | 0.250           |
| 2008 | 0.140                               | 0.006           |
| 2009 | 0.043                               | 0.220           |
| 2010 | 0.075                               | 0.120           |
| 2011 | 0.097                               | 0.073           |
| 2012 | 0.085                               | 0.083           |

<sup>1</sup> Moran's I is one of the most commonly used measures of global spatial autocorrelation. Values can range from -1 and 1, indicating dispersion and spatial dependence, respectively; values closer to 0 indicate spatial randomness. The null hypothesis for these significance tests is that there is no spatial autocorrelation.

<sup>2</sup> Residuals were calculated from our neighborhood fixed-effects linear regression models, with the primary exposure variable, vacancy rate. All models included a fixed-effect for each CSA (accounting for baseline differences by CSA), indicator variables for each year (accounting for any secular trends in the outcome), and as time-varying covariates, neighborhood racial diversity index, median sales price of homes, and total population size.
